# Supplementary material
Source: PubMed Central journal article supplement (PMC5135027)
Supplement: supp_WNL.0000000000003297_Table_e-1.pdf [file supp_WNL.0000000000003297_Table_e-1.pdf]

Table e-1. Analysis of the dose response of Aphasia on outcomes

|                                                              | Odds Ratio | 95%Confidence Interval | p-value |
|--------------------------------------------------------------|------------|------------------------|---------|
| Unadjusted Aphasia- Inpatient complications                  |            |                        |         |
| 0                                                            | ref        | ref                    | ref     |
| 1                                                            | 1.918      | 1.42-2.59              | <0.0001 |
| 2                                                            | 3.528      | 2.57-4.84              | <0.0001 |
| 3                                                            | 6.074      | 4.11-8.99              | <0.0001 |
| Unadjusted Right Hemiparesis (Arm) - Inpatient complications |            |                        |         |
| 0                                                            | ref        | ref                    | ref     |
| 1                                                            | 1.03       | 0.63-1.68              | 0.9146  |
| 2                                                            | 3.71       | 2.16-6.38              | <.0001  |
| 3                                                            | 11.0       | 6.32-19.15             | <.0001  |
| 4                                                            | 3.51       | 2.09-5.90              | <.0001  |
| Unadjusted Right Hemiparesis (Leg) - Inpatient complications |            |                        |         |
| 0                                                            | ref        | ref                    | ref     |
| 1                                                            | 1.41       | 0.86-2.34              | 0.1753  |
| 2                                                            | 5.85       | 3.65-9.40              | <.0001  |
| 3                                                            | 7.13       | 4.62-11.01             | <.0001  |
| 4                                                            | 5.75       | 3.10-10.67             | <.0001  |
| Unadjusted Aphasia- mRS 3-6                                  |            |                        |         |
| 0                                                            | ref        | ref                    | ref     |

|                                                               |        |             |         |
|---------------------------------------------------------------|--------|-------------|---------|
| 1                                                             | 2.49   | 1.96-3.16   | <0.0001 |
| 2                                                             | 6.98   | 4.95-9.83   | <0.0001 |
| 3                                                             | 51.9   | 19.12-141.3 | <0.0001 |
| Unadjusted Right Hemiparesis (Arm)<br>– mRS 3-6               |        |             |         |
| 0                                                             | ref    | ref         | ref     |
| 1                                                             | 1.701  | 1.25-2.31   | 0.0007  |
| 2                                                             | 5.673  | 3.27-9.84   | <.0001  |
| 3                                                             | 34.780 | 12.68-95.4  | <.0001  |
| 4                                                             | 14.931 | 7.44-29.9   | <.0001  |
| Unadjusted Right Hemiparesis (Leg) –<br>mRS 3-6               |        |             |         |
| 0                                                             | ref    | ref         | ref     |
| 1                                                             | 1.69   | 1.23-2.34   | 0.0012  |
| 2                                                             | 6.10   | 3.86-9.65   | <.0001  |
| 3                                                             | 13.62  | 7.99-23.21  | <.0001  |
| 4                                                             | 12.15  | 5.75-25.70  | <.0001  |
| Adjusted Aphasia- Inpatient<br>complications*                 |        |             |         |
| 0                                                             | ref    | ref         | ref     |
| 1                                                             | 1.458  | 1.06-1.99   | 0.0189  |
| 2                                                             | 1.364  | 0.89-2.08   | 0.1483  |
| 3                                                             | 1.252  | 0.69-2.26   | 0.4547  |
| Adjusted Right Hemiparesis (Arm) -<br>Inpatient complications |        |             |         |

|                                                               |       |           |        |
|---------------------------------------------------------------|-------|-----------|--------|
| 0                                                             | ref   | ref       | ref    |
| 1                                                             | 0.82  | 0.49-1.35 | 0.4321 |
| 2                                                             | 1.44  | 0.78-2.66 | 0.2441 |
| 3                                                             | 2.71  | 1.40-5.22 | 0.0030 |
| 4                                                             | 0.49  | 0.23-1.02 | 0.0573 |
| Adjusted Right Hemiparesis (Leg) -<br>Inpatient complications |       |           |        |
| 0                                                             | ref   | ref       | ref    |
| 1                                                             | 1.11  | 0.67-1.87 | 0.6681 |
| 2                                                             | 2.73  | 1.60-4.67 | 0.0002 |
| 3                                                             | 2.12  | 1.19-3.80 | 0.0108 |
| 4                                                             | 0.97  | 0.42-2.28 | 0.9552 |
| Adjusted Aphasia- mRS 3-6**                                   |       |           |        |
| 0                                                             | ref   | ref       | ref    |
| 1                                                             | 1.563 | 1.13-2.15 | 0.0065 |
| 2                                                             | 0.854 | 0.51-1.44 | 0.5521 |
| 3                                                             | 6.917 | 0.83-57.9 | 0.0745 |
| Adjusted Right Hemiparesis (Arm) –<br>mRS 3-6                 |       |           |        |
| 0                                                             | ref   | ref       | ref    |
| 1                                                             | 1.07  | 0.71-1.61 | 0.7443 |
| 2                                                             | 0.91  | 0.42-1.96 | 0.8101 |
| 3                                                             | 1.44  | 0.45-4.58 | 0.5358 |
| 4                                                             | 1.08  | 0.36-3.20 | 0.8926 |

|                                            |      |                |         |
|--------------------------------------------|------|----------------|---------|
| Adjusted Right Hemiparesis (Leg) – mRS 3-6 |      |                |         |
| 0                                          | ref  | ref            | ref     |
| 1                                          | 0.88 | 0.58-1.35      | 0.5734  |
| 2                                          | 1.10 | 0.57-2.14      | 0.7634  |
| 3                                          | 1.21 | 0.52-2.79      | 0.6530  |
| 4                                          | 0.48 | 0.14-1.74      | 0.2689  |
| Linear Regression for Length of Stay       |      |                |         |
|                                            | Beta | Standard Error | p-value |
| Unadjusted Aphasia- Length of Stay         |      |                |         |
| 0                                          | ref  | ref            | ref     |
| 1                                          | 2.28 | 0.58           | <0.0001 |
| 2                                          | 5.29 | 0.67           | <0.0001 |
| 3                                          | 7.59 | 0.84           | <0.0001 |
| Unadjusted Right Hemiparesis (Arm)         |      |                |         |
| 0                                          | ref  | ref            | ref     |
| 1                                          | 0.02 | 0.76           | 0.9720  |
| 2                                          | 5.58 | 1.14           | <.0001  |
| 3                                          | 9.72 | 1.05           | <.0001  |
| 4                                          | 6.72 | 1.05           | <.0001  |
| Unadjusted Right Hemiparesis (Leg)         |      |                |         |
| 0                                          | ref  | ref            | ref     |
| 1                                          | 1.00 | 0.79           | 0.2059  |
| 2                                          | 6.89 | 0.94           | <.0001  |
| 3                                          | 7.74 | 0.85           | <.0001  |

|                                    |       |      |        |
|------------------------------------|-------|------|--------|
| 4                                  | 6.75  | 1.24 | <.0001 |
| Adjusted Aphasia- Length of Stay** |       |      |        |
| 0                                  | ref   | ref  | ref    |
| 1                                  | 1.09  | 0.63 | 0.0856 |
| 2                                  | 0.63  | 0.86 | 0.4665 |
| 3                                  | 0.10  | 1.22 | 0.9325 |
| Adjusted Right Hemiparesis (Arm)   |       |      |        |
| 0                                  | ref   | ref  | ref    |
| 1                                  | -1.04 | 0.88 | 0.2365 |
| 2                                  | -0.32 | 1.34 | 0.8089 |
| 3                                  | 1.01  | 1.42 | 0.4757 |
| 4                                  | -2.38 | 1.50 | 0.1133 |
| Adjusted Right Hemiparesis (Leg)   |       |      |        |
| 0                                  | ref   | ref  | ref    |
| 1                                  | -0.80 | 0.92 | 0.3850 |
| 2                                  | -0.12 | 1.17 | 0.9140 |
| 3                                  | -0.61 | 1.23 | 0.6163 |
| 4                                  | -3.46 | 1.79 | 0.0532 |

\*Adjusting for NIHSS on admission

\*\*Adjusting for NIHSS on admission and inpatient complications
